# Supplementary material
Source: PubMed Central journal article supplement (PMC10408490)
Supplement: ajcr0013-3257-f4.pdf [file ajcr0013-3257-f4.pdf]

## CSF1R inhibition for advanced cancers

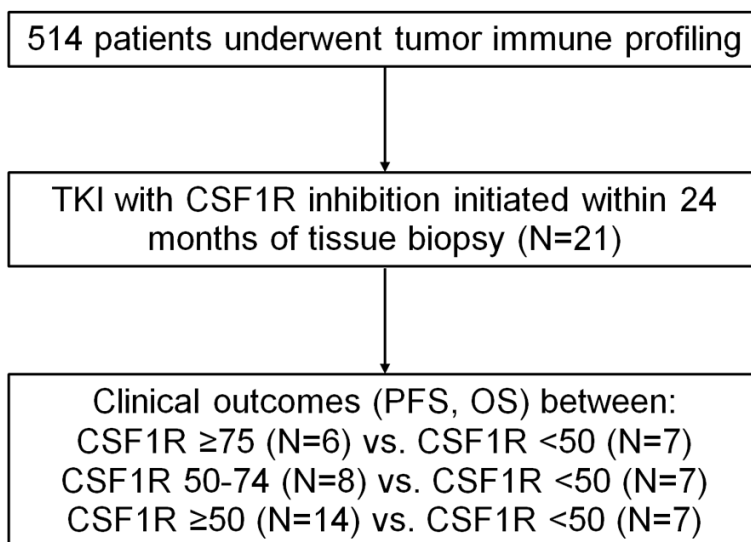

**Figure S1.** Consort diagram of the study. 514 patients underwent immune profiling with Omiseq assay. Twenty-one patients were initiated on tyrosine kinase inhibitors (TKI) with CSF1R inhibitor activity. Clinical outcomes of progression-free survival (PFS) and overall survival (OS) were assessed based on CSF1R RNA expression rank, using cutoffs of 50 and 75 percentile rank.

**Table S1.** CSF1R half-maximal inhibitory concentrations (IC50) of tyrosine kinase inhibitors with CSF1R inhibition administered to patients during the study

| CSF1R inhibitor          | IC50 for CSF1R                                 | References                                                                                                                                                                                                                                                                                                                                                                                                                            |
|--------------------------|------------------------------------------------|---------------------------------------------------------------------------------------------------------------------------------------------------------------------------------------------------------------------------------------------------------------------------------------------------------------------------------------------------------------------------------------------------------------------------------------|
| Pazopanib (GW786034)     | 146 nM                                         | <a href="https://www.selleckchem.com/products/pazopanib.html">https://www.selleckchem.com/products/pazopanib.html</a>                                                                                                                                                                                                                                                                                                                 |
| Regorafenib (BAY73-4506) | Kd 10 nM                                       | <a href="https://www.accessdata.fda.gov/drugsatfda_docs/nda/2019/203085Orig1s007.pdf">https://www.accessdata.fda.gov/drugsatfda_docs/nda/2019/203085Orig1s007.pdf</a>                                                                                                                                                                                                                                                                 |
| Sorafenib (BAY43-9006)   | 107 nM/L enzyme assay                          | Guo J, Marcotte PA, McCall JO, Dai Y, Pease LJ, Michaelides MR, Davidsen SK, Glaser KB. Inhibition of phosphorylation of the colony-stimulating factor-1 receptor (c-Fms) tyrosine kinase in transfected cells by ABT-869 and other tyrosine kinase inhibitors. <i>Mol Cancer Ther.</i> 2006 Apr;5(4):1007-13.                                                                                                                        |
| Sunitinib (SU11248)      | 20 nM/L cellular assay<br>7 nM/L enzyme assay  | <a href="https://mct.aacrjournals.org/content/5/4/1007.long">https://mct.aacrjournals.org/content/5/4/1007.long</a><br>Guo J, Marcotte PA, McCall JO, Dai Y, Pease LJ, Michaelides MR, Davidsen SK, Glaser KB. Inhibition of phosphorylation of the colony-stimulating factor-1 receptor (c-Fms) tyrosine kinase in transfected cells by ABT-869 and other tyrosine kinase inhibitors. <i>Mol Cancer Ther.</i> 2006 Apr;5(4):1007-13. |
| Crizotinib (PF-02341066) | 61 nM/L cellular assay<br>Kd 6.68 <sup>1</sup> | <a href="https://mct.aacrjournals.org/content/5/4/1007.long">https://mct.aacrjournals.org/content/5/4/1007.long</a><br><a href="http://ruben.ucsd.edu/dnet/tar_html/CSF1R.html">http://ruben.ucsd.edu/dnet/tar_html/CSF1R.html</a>                                                                                                                                                                                                    |
| Entrectinib (RXDX-101)   | Ki 7.40 <sup>2</sup>                           | <a href="http://ruben.ucsd.edu/dnet/tar_html/CSF1R.html">http://ruben.ucsd.edu/dnet/tar_html/CSF1R.html</a>                                                                                                                                                                                                                                                                                                                           |
| Pexidartinib             | 17 nM                                          | Benner B, Good L, Quiroga D, Schultz TE, Kassem M, Carson WE, Cherian MA, Sardesai S, Wesolowski R. Pexidartinib, a novel small molecule CSF-1R inhibitor in use for tenosynovial giant cell tumor: a systematic review of pre-clinical and clinical development. <i>Drug Des Devel Ther.</i> 2020 May 4;14:1693-1704. (Note: not used during study since it was not yet available)                                                   |

<sup>1</sup>Kd denotes dissociation constant. <sup>2</sup>Ki denotes inhibition constant. Ki refers to inhibition constant, while Kd means dissociation constant. Both terms are used to describe the binding affinity that a small molecule or macromolecule has for an enzyme or receptor. IC50 stands for inhibitory concentration 50%. That is, the concentration of inhibitor required to reduce the biological activity of interest to half of the uninhibited value. Because it does not directly measure a binding equilibrium, IC50 is less precise than Ki or Kd.
